# Supplementary material for: BitterSweetForest: A Random Forest Based Binary Classifier to Predict Bitterness and Sweetness of Chemical Compounds
Source: Front Chem. 2018 Apr 11;6:93. doi: 10.3389/fchem.2018.00093 (PMC5905275; doi:10.3389/fchem.2018.00093)
Supplement: Supplementary file 12 [file DataSheet4.xlsx]

## Sheet: Sheet1
Approved drugs predicted as bitter using BitterSweetForest
Drugbank_id	predicted class	Confidence score
DB00608	B	1
DB09326	B	1
DB01356	B	1
DB01356	B	1
DB00468	B	1
DB00908	B	1
DB00761	B	1
DB01164	B	1
DB09140	B	0.998
DB09129	B	0.998
DB00306	B	0.998
DB01718	B	0.998
DB00971	B	0.998
DB09155	B	0.996
DB01245	B	0.996
DB00418	B	0.996
DB01353	B	0.996
DB01377	B	0.996
DB01154	B	0.994
DB03843	B	0.994
DB01351	B	0.994
DB00556	B	0.992
DB06715	B	0.992
DB00277	B	0.992
DB00241	B	0.992
DB09131	B	0.992
DB01577	B	0.992
DB01352	B	0.992
DB02325	B	0.992
DB00653	B	0.992
DB09104	B	0.992
DB01093	B	0.99
DB01075	B	0.99
DB09153	B	0.99
DB00852	B	0.988
DB09414	B	0.988
DB01581	B	0.988
DB01364	B	0.988
DB09157	B	0.986
DB03128	B	0.986
DB00201	B	0.986
DB00721	B	0.986
DB09322	B	0.986
DB08913	B	0.984
DB01612	B	0.984
DB00676	B	0.984
DB00593	B	0.984
DB04572	B	0.984
DB00797	B	0.984
DB06706	B	0.984
DB09325	B	0.984
DB09152	B	0.982
DB08826	B	0.982
DB00435	B	0.982
DB01114	B	0.982
DB01231	B	0.982
DB03793	B	0.982
DB06793	B	0.982
DB09321	B	0.982
DB01107	B	0.982
DB00371	B	0.982
DB00647	B	0.982
DB09112	B	0.98
DB01611	B	0.98
DB01174	B	0.98
DB00202	B	0.98
DB01620	B	0.98
DB09472	B	0.98
DB00405	B	0.978
DB00835	B	0.978
DB01103	B	0.978
DB08991	B	0.978
DB01015	B	0.978
DB00806	B	0.978
DB09315	B	0.976
DB00366	B	0.976
DB00748	B	0.976
DB09116	B	0.976
DB01008	B	0.976
DB00779	B	0.976
DB00467	B	0.976
DB08799	B	0.974
DB01161	B	0.974
DB01173	B	0.974
DB00263	B	0.974
DB01638	S	0.974
DB00742	S	0.974
DB09348	B	0.972
DB04552	B	0.972
DB06723	B	0.972
DB09479	B	0.97
DB01237	B	0.97
DB00891	B	0.97
DB00550	B	0.97
DB00860	B	0.968
DB00860	B	0.968
DB00860	B	0.968
DB00860	B	0.968
DB00860	B	0.968
DB00860	B	0.968
DB00860	B	0.968
DB00860	B	0.968
DB00860	B	0.968
DB00860	B	0.968
DB00184	B	0.968
DB00557	B	0.968
DB01438	B	0.968
DB00860	B	0.968
DB00298	B	0.966
DB00677	B	0.966
DB00825	B	0.966
DB01437	B	0.966
DB00312	B	0.966
DB01435	B	0.966
DB00813	B	0.966
DB01412	B	0.966
DB01914	S	0.966
DB00237	B	0.964
DB00189	B	0.964
DB08798	B	0.964
DB00571	B	0.964
DB09092	B	0.964
DB08941	B	0.964
DB09218	B	0.962
DB00794	B	0.962
DB00599	B	0.962
DB09283	B	0.962
DB01035	B	0.962
DB09146	S	0.962
DB09087	B	0.96
DB00613	B	0.96
DB01424	B	0.96
DB00292	B	0.96
DB00359	B	0.96
DB00763	B	0.96
DB00152	B	0.96
DB00581	S	0.96
DB00338	B	0.96
DB00772	B	0.958
DB09460	B	0.958
DB00411	B	0.958
DB00440	B	0.958
DB00632	B	0.958
DB01744	B	0.958
DB06724	B	0.958
DB00380	B	0.956
DB11609	B	0.956
DB00592	B	0.956
DB00741	B	0.956
DB00741	B	0.956
DB00741	B	0.956
DB00741	B	0.956
DB00741	B	0.956
DB01298	B	0.956
DB06698	B	0.956
DB01121	B	0.956
DB00741	B	0.956
DB00741	B	0.956
DB00741	B	0.956
DB01244	B	0.956
DB00741	B	0.956
DB09002	B	0.954
DB04837	B	0.954
DB09513	B	0.954
DB01354	B	0.954
DB00810	B	0.954
DB05246	B	0.954
DB06150	B	0.954
DB00250	B	0.954
DB00191	B	0.954
DB00809	B	0.952
DB00651	B	0.952
DB01010	B	0.952
DB01090	B	0.952
DB00853	B	0.952
DB00553	B	0.952
DB01586	B	0.952
DB06777	B	0.952
DB06783	B	0.95
DB06711	B	0.95
DB00812	B	0.95
DB00515	B	0.95
DB00736	B	0.95
DB00213	B	0.95
DB06694	B	0.948
DB01592	B	0.948
DB00961	B	0.948
DB01236	B	0.948
DB01582	B	0.948
DB00389	B	0.948
DB01392	B	0.948
DB01365	B	0.948
DB01211	B	0.948
DB06770	B	0.946
DB09413	B	0.946
DB11610	B	0.946
DB01482	B	0.946
DB00907	B	0.946
DB00818	B	0.946
DB00426	B	0.946
DB01044	B	0.946
DB00664	B	0.946
DB00858	B	0.944
DB09194	B	0.944
DB01037	B	0.944
DB00252	B	0.944
DB06811	B	0.944
DB06756	B	0.944
DB06787	B	0.944
DB09161	B	0.942
DB00199	B	0.942
DB00199	B	0.942
DB00199	B	0.942
DB00865	B	0.942
DB00942	B	0.942
DB01190	B	0.942
DB01190	B	0.942
DB09277	B	0.942
DB00780	B	0.942
DB00387	B	0.942
DB00376	B	0.942
DB00849	B	0.942
DB01355	B	0.942
DB00395	B	0.942
DB01337	B	0.942
DB00199	B	0.942
DB01190	B	0.942
DB09084	B	0.942
DB00815	B	0.94
DB00959	B	0.94
DB00959	B	0.94
DB00959	B	0.94
DB08924	B	0.94
DB00564	B	0.94
DB09256	B	0.94
DB09096	B	0.94
DB00959	B	0.94
DB00959	B	0.94
DB00635	B	0.94
DB09449	B	0.94
DB00940	B	0.94
DB01550	B	0.938
DB06716	B	0.938
DB00752	B	0.938
DB00609	B	0.938
DB00904	B	0.938
DB00122	B	0.936
DB00122	B	0.936
DB01558	B	0.936
DB00832	B	0.936
DB00951	B	0.936
DB01208	B	0.936
DB00978	B	0.936
DB00792	B	0.936
DB01086	B	0.936
DB01187	B	0.934
DB08887	B	0.934
DB04948	B	0.934
DB00754	B	0.934
DB00454	B	0.934
DB00474	B	0.934
DB00682	B	0.934
DB00266	B	0.934
DB06282	B	0.932
DB00341	B	0.932
DB09110	B	0.932
DB08792	B	0.932
DB09014	B	0.932
DB01100	B	0.932
DB08797	B	0.932
DB00339	B	0.932
DB01580	B	0.932
DB00731	B	0.932
DB00729	B	0.932
DB00272	B	0.93
DB09536	B	0.93
DB00514	B	0.93
DB01563	B	0.93
DB00258	B	0.93
DB01059	B	0.93
DB01148	B	0.93
DB00946	B	0.93
DB01156	B	0.93
DB01294	B	0.928
DB00458	B	0.928
DB00784	B	0.928
DB00724	B	0.928
DB01170	B	0.928
DB00281	B	0.928
DB00937	B	0.928
DB09293	B	0.926
DB04967	B	0.926
DB09160	B	0.926
DB13165	B	0.926
DB06701	B	0.926
DB00422	B	0.926
DB01032	B	0.926
DB05245	B	0.926
DB01069	B	0.926
DB01616	B	0.926
DB00703	B	0.924
DB00854	B	0.924
DB00985	B	0.924
DB06714	B	0.924
DB01149	B	0.924
DB00273	B	0.924
DB01339	B	0.924
DB04908	B	0.924
DB00283	B	0.924
DB08800	B	0.924
DB00627	B	0.924
DB00670	B	0.924
DB01011	B	0.922
DB04844	B	0.922
DB00822	B	0.922
DB00617	B	0.922
DB00918	B	0.922
DB00333	B	0.922
DB00898	B	0.922
DB06767	B	0.922
DB00354	B	0.92
DB00726	B	0.92
DB00490	B	0.92
DB01165	B	0.92
DB01127	B	0.92
DB00584	B	0.92
DB01214	B	0.92
DB03255	B	0.92
DB01626	B	0.92
DB01275	B	0.92
DB09069	B	0.92
DB03904	B	0.92
DB00847	B	0.92
DB01137	B	0.92
DB01579	B	0.918
DB00843	B	0.918
DB00656	B	0.918
DB01320	B	0.918
DB06690	B	0.918
DB01159	B	0.918
DB01099	B	0.918
DB00612	B	0.918
DB02701	B	0.918
DB01176	B	0.916
DB00504	B	0.916
DB01433	B	0.916
DB01227	B	0.916
DB01085	B	0.916
DB00989	B	0.916
DB06413	B	0.916
DB00745	B	0.916
DB01028	B	0.916
DB03166	B	0.916
DB08801	B	0.916
DB08807	B	0.916
DB09083	B	0.916
DB01182	B	0.916
DB00280	B	0.916
DB01184	B	0.916
DB01110	B	0.916
DB00534	B	0.914
DB00536	B	0.914
DB09081	B	0.914
DB01576	B	0.914
DB00182	B	0.914
DB00246	B	0.914
DB00913	B	0.914
DB00487	B	0.914
DB00600	B	0.914
DB02513	B	0.912
DB00909	B	0.912
DB01169	B	0.912
DB09115	B	0.912
DB09395	B	0.912
DB01191	B	0.912
DB08936	B	0.91
DB01246	B	0.91
DB01151	B	0.91
DB00316	B	0.91
DB06738	B	0.91
DB00924	B	0.91
DB06809	B	0.91
DB00969	B	0.91
DB01625	B	0.91
DB00804	B	0.91
DB01050	B	0.908
DB01050	B	0.908
DB01050	B	0.908
DB09350	B	0.908
DB00734	B	0.908
DB04842	B	0.908
DB00193	B	0.908
DB05016	B	0.908
DB09213	B	0.908
DB00817	B	0.908
DB01012	B	0.908
DB00335	B	0.908
DB00464	B	0.908
DB01708	B	0.906
DB09327	B	0.906
DB00370	B	0.906
DB00347	B	0.906
DB00537	B	0.906
DB00207	B	0.906
DB08802	B	0.906
DB00960	B	0.906
DB01708	B	0.906
DB00738	B	0.904
DB01400	B	0.904
DB09210	B	0.904
DB00802	B	0.904
DB00264	B	0.904
DB00866	B	0.904
DB00379	B	0.904
DB01113	B	0.904
DB00711	B	0.902
DB01123	B	0.902
DB00633	B	0.902
DB00392	B	0.902
DB00990	B	0.902
DB00551	B	0.902
DB06147	B	0.902
DB09091	B	0.902
DB00638	S	0.9
DB08918	B	0.9
DB04896	B	0.9
DB00327	B	0.9
DB01153	B	0.9
DB08943	B	0.9
DB00598	B	0.9
DB09242	B	0.9
DB01382	B	0.9
DB09089	B	0.9
DB01084	B	0.898
DB09269	B	0.898
DB08815	B	0.898
DB00708	B	0.898
DB00778	B	0.898
DB00979	B	0.896
DB05266	B	0.896
DB01238	B	0.896
DB09028	B	0.896
DB09262	B	0.896
DB01238	B	0.896
DB00409	B	0.896
DB00315	B	0.896
DB01394	B	0.896
DB01041	B	0.896
DB05381	B	0.896
DB00357	B	0.896
DB01299	B	0.894
DB09117	B	0.894
DB00228	B	0.894
DB00687	B	0.894
DB01253	B	0.894
DB09205	B	0.894
DB01089	B	0.894
DB01057	B	0.892
DB01146	B	0.892
DB09273	B	0.892
DB01407	B	0.892
DB00431	B	0.892
DB08908	B	0.892
DB00238	B	0.892
DB06799	B	0.892
DB00521	B	0.892
DB08958	B	0.892
DB01003	B	0.89
DB01087	B	0.89
DB09295	B	0.89
DB01463	B	0.89
DB00321	B	0.89
DB01217	B	0.89
DB00544	B	0.89
DB08808	B	0.89
DB00527	B	0.89
DB00498	B	0.89
DB11104	B	0.888
DB00147	B	0.888
DB05260	B	0.888
DB00450	B	0.888
DB00420	B	0.888
DB00268	B	0.888
DB00169	B	0.888
DB09143	B	0.888
DB00943	B	0.888
DB00218	B	0.888
DB00206	B	0.888
DB00975	B	0.888
DB00253	B	0.886
DB06148	B	0.886
DB00645	B	0.886
DB06401	B	0.886
DB00925	B	0.886
DB01390	B	0.886
DB01105	B	0.886
DB09020	B	0.886
DB13158	B	0.884
DB00737	B	0.884
DB00185	B	0.884
DB01559	B	0.884
DB00245	B	0.884
DB01202	B	0.884
DB00776	B	0.884
DB00652	B	0.884
DB01002	B	0.884
DB00297	B	0.884
DB05812	B	0.884
DB00496	B	0.884
DB00589	B	0.884
DB06691	B	0.884
DB08954	B	0.884
DB00692	B	0.884
DB00257	B	0.884
DB01157	B	0.882
DB01192	B	0.882
DB09243	B	0.882
DB09342	B	0.882
DB09016	B	0.882
DB01065	B	0.882
DB00953	B	0.882
DB00710	B	0.882
DB06589	B	0.882
DB08982	B	0.882
DB01436	B	0.882
DB00424	B	0.882
DB00572	B	0.882
DB00751	B	0.88
DB09209	B	0.88
DB04465	S	0.88
DB09526	B	0.88
DB00730	B	0.88
DB00178	B	0.88
DB01116	B	0.88
DB00575	B	0.88
DB09284	B	0.88
DB01022	B	0.88
DB00219	B	0.88
DB00448	B	0.88
DB08922	B	0.878
DB08970	B	0.878
DB09223	B	0.878
DB09351	B	0.878
DB00334	B	0.878
DB09224	B	0.878
DB00915	B	0.878
DB00669	B	0.878
DB08992	B	0.878
DB00697	B	0.878
DB01338	B	0.878
DB01168	B	0.878
DB08970	B	0.878
DB00195	B	0.878
DB00912	B	0.878
DB00771	B	0.878
DB00964	B	0.876
DB08803	B	0.876
DB00443	B	0.876
DB00443	B	0.876
DB00443	B	0.876
DB00443	B	0.876
DB00443	B	0.876
DB00443	B	0.876
DB00443	B	0.876
DB01234	B	0.876
DB01234	B	0.876
DB01234	B	0.876
DB01234	B	0.876
DB01234	B	0.876
DB04841	B	0.876
DB00949	B	0.876
DB00827	B	0.876
DB01764	B	0.876
DB01234	B	0.876
DB00788	B	0.876
DB00657	B	0.876
DB00243	B	0.876
DB06824	B	0.876
DB00795	B	0.876
DB00443	B	0.876
DB00747	B	0.876
DB01234	B	0.876
DB08796	B	0.874
DB00935	B	0.874
DB00516	B	0.874
DB01243	B	0.874
DB01511	B	0.874
DB09204	B	0.874
DB01267	B	0.874
DB01267	B	0.874
DB00259	B	0.874
DB09332	B	0.872
DB00740	B	0.872
DB00543	B	0.872
DB08905	B	0.872
DB01025	B	0.872
DB00388	B	0.87
DB09290	B	0.87
DB01242	B	0.87
DB09118	B	0.87
DB09288	B	0.87
DB09285	B	0.87
DB00488	B	0.87
DB01033	B	0.87
DB00931	B	0.87
DB00396	B	0.87
DB00217	B	0.87
DB00621	B	0.87
DB00136	B	0.87
DB00744	B	0.868
DB01452	B	0.868
DB00573	B	0.868
DB00484	B	0.868
DB00787	B	0.868
DB08806	B	0.868
DB00254	B	0.868
DB00874	B	0.866
DB08998	B	0.866
DB09128	B	0.866
DB06144	B	0.866
DB06204	B	0.866
DB00296	B	0.866
DB01138	B	0.866
DB00649	B	0.866
DB01256	B	0.866
DB01007	B	0.866
DB04838	B	0.866
DB00146	B	0.866
DB00486	B	0.866
DB00462	B	0.866
DB00873	B	0.864
DB00141	S	0.864
DB00265	B	0.864
DB09510	B	0.864
DB00545	B	0.864
DB00363	B	0.864
DB00906	B	0.864
DB00611	B	0.864
DB01221	B	0.864
DB01133	B	0.864
DB00437	B	0.864
DB00759	B	0.864
DB00634	B	0.864
DB01091	B	0.864
DB04794	B	0.864
DB00636	B	0.864
DB01180	B	0.864
DB06796	B	0.862
DB08979	B	0.862
DB01222	B	0.862
DB00221	B	0.862
DB01031	B	0.862
DB06804	B	0.862
DB00344	B	0.862
DB01226	B	0.862
DB00236	B	0.862
DB01359	B	0.862
DB00782	B	0.862
DB00981	B	0.86
DB08996	B	0.86
DB00750	B	0.86
DB01005	B	0.86
DB00198	B	0.86
DB00260	B	0.86
DB00882	B	0.86
DB01348	B	0.86
DB09236	B	0.86
DB01158	B	0.86
DB06412	B	0.86
DB09150	S	0.858
DB00167	B	0.858
DB01567	B	0.858
DB09286	B	0.858
DB00216	B	0.858
DB09216	B	0.858
DB00675	B	0.858
DB00526	B	0.858
DB00851	B	0.858
DB00828	B	0.858
DB06410	B	0.858
DB04571	B	0.858
DB00699	B	0.858
DB00170	B	0.858
DB08909	B	0.858
DB00153	B	0.858
DB05990	B	0.858
DB00944	B	0.856
DB01466	B	0.856
DB00394	B	0.856
DB04890	B	0.856
DB09085	B	0.856
DB00648	B	0.856
DB08903	B	0.856
DB01155	B	0.856
DB01216	B	0.856
DB01013	B	0.856
DB00240	B	0.856
DB01297	B	0.856
DB00559	B	0.856
DB08882	B	0.856
DB00927	B	0.856
DB01001	B	0.854
DB01291	B	0.854
DB06764	B	0.854
DB01218	B	0.854
DB00172	B	0.854
DB00624	B	0.854
DB00624	B	0.854
DB00624	B	0.854
DB00624	B	0.854
DB09244	B	0.854
DB13139	B	0.854
DB06700	B	0.854
DB01189	B	0.854
DB01628	B	0.854
DB00624	B	0.854
DB06795	B	0.854
DB06403	B	0.854
DB00914	B	0.854
DB11699	B	0.854
DB01071	B	0.852
DB00956	B	0.852
DB08990	B	0.852
DB01411	B	0.852
DB00824	B	0.852
DB00830	B	0.852
DB09197	B	0.852
DB09477	B	0.852
DB09166	B	0.852
DB01588	B	0.852
DB00186	B	0.852
DB00829	B	0.852
DB00933	B	0.852
DB08439	B	0.852
DB00758	B	0.852
DB00412	B	0.852
DB01615	B	0.85
DB09124	B	0.85
DB01185	B	0.85
DB00187	B	0.85
DB01064	B	0.85
DB01166	B	0.85
DB00427	B	0.848
DB06708	B	0.848
DB01419	B	0.848
DB09003	B	0.848
DB06594	B	0.848
DB00690	B	0.848
DB00413	B	0.848
DB00369	B	0.848
DB01062	B	0.848
DB00867	B	0.848
DB00525	B	0.848
DB00457	B	0.848
DB11362	B	0.848
DB00704	B	0.848
DB00673	B	0.848
DB08965	B	0.846
DB00623	B	0.846
DB00769	B	0.846
DB01179	B	0.846
DB00962	B	0.846
DB08811	B	0.846
DB00842	B	0.846
DB01224	B	0.846
DB00850	B	0.846
DB00623	B	0.846
DB00623	B	0.846
DB00508	B	0.846
DB00247	B	0.846
DB00483	B	0.846
DB00712	B	0.846
DB00712	B	0.846
DB00709	B	0.846
DB00577	B	0.846
DB00685	B	0.846
DB01162	B	0.846
DB01036	B	0.846
DB00239	B	0.846
DB00519	B	0.846
DB01340	B	0.846
DB01018	B	0.846
DB08804	B	0.846
DB01129	B	0.846
DB00287	B	0.844
DB00660	B	0.844
DB01273	B	0.844
DB01247	B	0.844
DB00313	B	0.844
DB00939	B	0.844
DB00179	B	0.844
DB09031	B	0.844
DB03209	B	0.844
DB06820	B	0.844
DB08931	B	0.844
DB00348	B	0.844
DB06819	B	0.844
DB01144	B	0.842
DB00719	B	0.842
DB00662	B	0.842
DB01303	B	0.842
DB00196	B	0.842
DB00324	B	0.842
DB09047	B	0.842
DB00777	B	0.842
DB00475	B	0.842
DB00679	B	0.842
DB01614	B	0.842
DB00952	B	0.842
DB00595	B	0.842
DB00793	B	0.842
DB00196	B	0.842
DB00324	B	0.842
DB00384	B	0.842
DB00594	B	0.842
DB00757	B	0.842
DB00358	B	0.84
DB06261	B	0.84
DB09352	B	0.84
DB00408	B	0.84
DB00477	B	0.84
DB01199	B	0.84
DB09097	B	0.84
DB01130	B	0.84
DB00856	B	0.84
DB09040	B	0.84
DB00973	B	0.84
DB01102	B	0.84
DB00140	B	0.84
DB06717	B	0.84
DB00950	B	0.838
DB08823	B	0.838
DB00861	B	0.838
DB00688	B	0.838
DB00255	B	0.838
DB00261	B	0.838
DB08912	B	0.838
DB00705	B	0.838
DB00229	B	0.838
DB00255	B	0.838
DB01188	B	0.838
DB08822	B	0.838
DB00561	B	0.836
DB09114	B	0.836
DB00397	B	0.836
DB00120	B	0.836
DB00192	B	0.836
DB09048	B	0.836
DB00568	B	0.836
DB00285	B	0.836
DB00349	B	0.836
DB04946	B	0.836
DB00936	B	0.836
DB08987	B	0.836
DB00845	B	0.836
DB00954	B	0.836
DB06729	B	0.836
DB06211	B	0.836
DB11921	B	0.836
DB06789	B	0.836
DB01029	B	0.836
DB00722	B	0.836
DB04840	B	0.836
DB00244	B	0.836
DB06766	B	0.834
DB00295	B	0.834
DB00223	B	0.834
DB09211	B	0.834
DB09017	B	0.834
DB00555	B	0.834
DB00295	B	0.834
DB00739	B	0.834
DB00367	B	0.834
DB00248	B	0.834
DB03619	B	0.834
DB00663	B	0.834
DB00790	B	0.834
DB09345	B	0.834
DB00336	B	0.834
DB13142	S	0.834
DB01132	B	0.834
DB00579	B	0.834
DB09219	B	0.834
DB09219	B	0.834
DB04843	B	0.834
DB01210	B	0.832
DB11614	B	0.832
DB00938	B	0.832
DB00205	B	0.832
DB00289	B	0.832
DB01384	B	0.832
DB01126	B	0.832
DB06207	B	0.832
DB00820	B	0.832
DB00881	B	0.832
DB01023	B	0.832
DB00214	B	0.832
DB00576	B	0.832
DB01070	B	0.832
DB09300	B	0.832
DB00972	B	0.83
DB01040	B	0.83
DB00805	B	0.83
DB09245	B	0.83
DB01186	B	0.83
DB01254	B	0.83
DB00305	B	0.83
DB00888	B	0.83
DB09183	B	0.83
DB01301	B	0.83
DB01136	B	0.83
DB06210	B	0.83
DB01289	B	0.83
DB01250	B	0.83
DB01081	B	0.83
DB06782	B	0.828
DB00868	B	0.828
DB00620	B	0.828
DB00620	B	0.828
DB00620	B	0.828
DB00620	B	0.828
DB00821	B	0.828
DB09212	B	0.828
DB09237	B	0.828
DB08984	B	0.828
DB00539	B	0.828
DB06616	B	0.828
DB00352	B	0.828
DB00890	B	0.828
DB00618	B	0.828
DB00381	B	0.828
DB00270	B	0.828
DB00350	B	0.828
DB06751	B	0.828
DB00620	B	0.828
DB06704	B	0.826
DB00455	B	0.826
DB00988	B	0.826
DB00753	B	0.826
DB04835	B	0.826
DB01413	B	0.826
DB09320	B	0.826
DB00203	B	0.826
DB02300	B	0.826
DB01599	B	0.826
DB09279	B	0.826
DB01349	B	0.826
DB00988	B	0.826
DB01420	B	0.824
DB09034	B	0.824
DB00683	B	0.824
DB00998	B	0.824
DB00353	B	0.824
DB09281	B	0.824
DB01205	B	0.822
DB00717	B	0.822
DB00717	B	0.822
DB04877	B	0.822
DB09534	B	0.822
DB01209	B	0.822
DB00497	B	0.822
DB00899	B	0.822
DB00582	B	0.822
DB01422	B	0.822
DB01416	B	0.822
DB00717	B	0.822
DB00957	B	0.822
DB06695	B	0.822
DB11126	S	0.822
DB01183	B	0.822
DB02659	B	0.822
DB00377	B	0.822
DB01143	B	0.82
DB06771	B	0.82
DB08911	B	0.82
DB08901	B	0.82
DB09257	B	0.82
DB08934	B	0.82
DB00911	B	0.82
DB00976	B	0.82
DB01139	B	0.82
DB06710	B	0.82
DB00400	B	0.82
DB00966	B	0.82
DB01228	B	0.82
DB00326	S	0.82
DB00222	B	0.82
DB00512	B	0.82
DB08819	B	0.818
DB01380	B	0.818
DB00967	B	0.818
DB00716	B	0.818
DB01117	B	0.818
DB09198	B	0.818
DB00897	B	0.818
DB00404	B	0.818
DB00628	B	0.818
DB01063	B	0.818
DB00320	B	0.818
DB09053	B	0.818
DB00530	B	0.818
DB01264	B	0.818
DB11590	B	0.818
DB00756	B	0.818
DB00764	B	0.818
DB01017	B	0.818
DB00654	B	0.816
DB01624	B	0.816
DB01135	B	0.816
DB00958	B	0.816
DB00625	B	0.816
DB09042	B	0.816
DB00735	B	0.816
DB08983	B	0.816
DB00524	B	0.816
DB00308	B	0.816
DB00208	B	0.816
DB09144	B	0.816
DB00583	B	0.816
DB00819	B	0.814
DB00885	B	0.814
DB06709	B	0.814
DB01545	B	0.814
DB09120	B	0.814
DB09570	B	0.814
DB00714	B	0.814
DB00590	B	0.814
DB00368	B	0.814
DB00775	B	0.814
DB06768	B	0.812
DB09060	B	0.812
DB00715	B	0.812
DB01589	B	0.812
DB09225	B	0.812
DB00941	B	0.812
DB00267	B	0.812
DB00278	B	0.812
DB01501	B	0.812
DB11591	B	0.81
DB00902	B	0.81
DB04930	B	0.81
DB01058	B	0.81
DB04224	B	0.81
DB09138	B	0.81
DB00472	B	0.81
DB01621	B	0.81
DB06623	B	0.81
DB00728	B	0.81
DB09073	B	0.81
DB01177	B	0.81
DB01610	B	0.81
DB01049	B	0.81
DB09075	B	0.81
DB06605	B	0.81
DB00517	B	0.808
DB00659	B	0.808
DB01043	B	0.808
DB09119	B	0.808
DB00318	B	0.808
DB08828	B	0.808
DB09330	B	0.808
DB00309	B	0.808
DB00799	B	0.808
DB00691	B	0.808
DB00637	B	0.806
DB00332	B	0.806
DB00894	B	0.806
DB00984	B	0.806
DB09221	B	0.806
DB00425	B	0.806
DB00831	B	0.806
DB00921	B	0.806
DB00469	B	0.806
DB00619	B	0.806
DB00274	B	0.806
DB00275	B	0.806
DB04871	B	0.806
DB01430	B	0.804
DB01410	B	0.804
DB01171	B	0.804
DB00934	B	0.804
DB01215	B	0.804
DB01489	B	0.804
DB00433	B	0.804
DB06654	B	0.804
DB00665	B	0.804
DB01053	B	0.804
DB01053	B	0.804
DB00227	B	0.804
DB00678	B	0.804
DB00887	B	0.804
DB01426	B	0.804
DB00836	B	0.804
DB00889	B	0.804
DB09093	B	0.804
DB01366	B	0.802
DB01131	B	0.802
DB00507	B	0.802
DB00596	B	0.802
DB06684	B	0.802
DB00546	B	0.802
DB01239	B	0.802
DB05015	B	0.802
DB05294	B	0.802
DB08930	B	0.802
DB01598	B	0.802
DB01605	B	0.802
DB06267	B	0.802
DB11619	B	0.802
DB06730	B	0.802
DB00177	B	0.802
DB09012	B	0.802
DB08994	B	0.802
DB00725	B	0.802
DB00383	B	0.802
DB09082	B	0.8
DB06637	B	0.8
DB00540	B	0.8
DB09000	B	0.8
DB01367	B	0.8
DB06201	B	0.8
DB08865	B	0.8
DB01181	B	0.8
DB01066	B	0.8
DB09070	B	0.8
DB00800	B	0.8
DB01083	B	0.8
DB06800	B	0.8
DB00986	B	0.8
DB09080	B	0.798
DB01403	B	0.798
DB00630	B	0.798
DB00276	B	0.798
DB00879	B	0.798
DB01603	B	0.798
DB01421	S	0.798
DB01233	B	0.798
DB05039	B	0.796
DB00173	B	0.796
DB01000	B	0.796
DB00696	B	0.796
DB06725	B	0.796
DB04868	B	0.796
DB00233	B	0.796
DB00760	B	0.796
DB00857	B	0.796
DB00796	B	0.796
DB00700	B	0.796
DB00658	B	0.794
DB00658	B	0.794
DB00588	B	0.794
DB06816	B	0.794
DB01142	B	0.794
DB01622	B	0.794
DB11363	B	0.794
DB00262	B	0.794
DB00303	B	0.794
DB00603	B	0.794
DB00661	B	0.794
DB04920	B	0.794
DB01193	B	0.794
DB00373	B	0.794
DB09333	B	0.792
DB01096	B	0.792
DB00402	B	0.792
DB01198	B	0.792
DB01101	B	0.792
DB00417	B	0.792
DB00910	B	0.792
DB06781	B	0.792
DB01241	B	0.792
DB00360	B	0.792
DB00920	B	0.79
DB00149	B	0.79
DB09086	B	0.79
DB01104	B	0.79
DB09167	B	0.79
DB13025	B	0.79
DB04845	B	0.79
DB00604	B	0.79
DB00674	B	0.788
DB00502	B	0.788
DB00502	B	0.788
DB01006	B	0.788
DB00541	B	0.788
DB06817	B	0.788
DB00220	B	0.788
DB00446	B	0.788
DB06202	B	0.788
DB00378	B	0.788
DB00446	B	0.788
DB09220	B	0.788
DB00126	B	0.788
DB09149	B	0.786
DB08966	B	0.786
DB09136	B	0.786
DB09304	B	0.786
DB00493	B	0.786
DB01326	B	0.786
DB00713	B	0.786
DB06792	B	0.784
DB00816	B	0.784
DB09316	B	0.784
DB00231	B	0.784
DB08967	B	0.784
DB01551	B	0.784
DB00970	B	0.784
DB01319	B	0.784
DB01627	B	0.784
DB00614	B	0.784
DB05013	B	0.784
DB00871	B	0.782
DB00190	B	0.782
DB04304	S	0.782
DB00494	B	0.782
DB08895	B	0.782
DB01097	B	0.782
DB01024	B	0.782
DB00307	B	0.782
DB04911	B	0.782
DB00862	B	0.782
DB01200	B	0.782
DB00639	B	0.782
DB00876	B	0.782
DB00331	B	0.782
DB00434	B	0.78
DB00587	B	0.78
DB01440	B	0.78
DB00565	B	0.78
DB00732	B	0.78
DB00993	B	0.78
DB00932	B	0.78
DB00401	B	0.78
DB00421	B	0.78
DB00723	B	0.78
DB00470	B	0.78
DB01213	B	0.778
DB01122	B	0.778
DB09021	B	0.778
DB06288	B	0.778
DB00399	B	0.778
DB00995	B	0.778
DB09215	B	0.778
DB00605	B	0.778
DB09054	B	0.778
DB01212	B	0.778
DB01328	B	0.778
DB00294	B	0.778
DB00310	B	0.778
DB11093	B	0.778
DB01124	B	0.778
DB06155	B	0.778
DB01609	B	0.776
DB00554	B	0.776
DB00554	B	0.776
DB09195	B	0.776
DB00554	B	0.776
DB00570	B	0.776
DB09299	B	0.776
DB01108	B	0.776
DB00459	B	0.776
DB00235	B	0.776
DB08814	B	0.776
DB00284	S	0.776
DB08820	B	0.774
DB01106	B	0.774
DB00132	B	0.774
DB00766	B	0.774
DB00770	B	0.774
DB00230	B	0.774
DB05676	B	0.774
DB09063	B	0.774
DB00442	B	0.774
DB00701	B	0.774
DB00529	B	0.774
DB00770	B	0.774
DB09282	B	0.774
DB04855	B	0.774
DB00668	B	0.774
DB00549	B	0.772
DB00983	B	0.772
DB09076	B	0.772
DB00159	B	0.772
DB01274	B	0.772
DB09324	B	0.772
DB00176	B	0.772
DB00801	B	0.772
DB06016	B	0.772
DB00423	B	0.772
DB00814	B	0.772
DB04865	B	0.772
DB00361	B	0.772
DB00900	B	0.772
DB01361	B	0.772
DB00438	B	0.772
DB09324	B	0.772
DB04839	B	0.772
DB01203	B	0.772
DB00808	B	0.772
DB00163	B	0.772
DB00839	B	0.772
DB09346	B	0.77
DB08944	B	0.77
DB01409	B	0.77
DB08906	B	0.77
DB01034	B	0.77
DB09495	B	0.77
DB13164	B	0.77
DB01118	B	0.77
DB01172	S	0.77
DB00743	B	0.768
DB01125	B	0.768
DB08883	B	0.768
DB00749	B	0.768
DB11581	B	0.768
DB00478	B	0.768
DB00456	B	0.768
DB00286	B	0.768
DB00288	B	0.768
DB00672	B	0.768
DB00174	S	0.766
DB01112	B	0.766
DB01112	B	0.766
DB01019	B	0.766
DB00441	B	0.766
DB06769	B	0.766
DB01112	B	0.766
DB00346	B	0.766
DB00251	B	0.766
DB00586	B	0.766
DB06480	B	0.766
DB09340	B	0.764
DB01618	B	0.764
DB01608	B	0.764
DB08868	B	0.764
DB09008	B	0.764
DB08964	B	0.764
DB00547	B	0.764
DB00211	B	0.764
DB09125	B	0.764
DB06203	B	0.764
DB09049	B	0.764
DB01623	B	0.762
DB11582	B	0.762
DB01283	B	0.762
DB00499	B	0.762
DB11730	B	0.762
DB01145	B	0.762
DB00301	B	0.762
DB00892	B	0.762
DB09154	B	0.762
DB06335	B	0.762
DB09162	B	0.76
DB00884	B	0.76
DB00482	B	0.76
DB00694	B	0.76
DB03615	S	0.76
DB01331	B	0.76
DB00607	B	0.76
DB00351	B	0.76
DB00655	B	0.76
DB01197	B	0.76
DB00489	B	0.76
DB01324	B	0.76
DB00610	B	0.76
DB09148	B	0.758
DB00128	S	0.758
DB12831	B	0.758
DB00720	B	0.758
DB00445	B	0.758
DB00997	B	0.758
DB01262	B	0.758
DB09027	B	0.758
DB00601	B	0.758
DB01330	B	0.758
DB00560	B	0.758
DB01591	B	0.758
DB04876	B	0.758
DB01120	B	0.758
DB07615	B	0.756
DB01587	B	0.756
DB00391	B	0.756
DB00317	B	0.756
DB00896	B	0.756
DB01076	B	0.756
DB00945	B	0.756
DB01095	B	0.756
DB00232	B	0.756
DB09561	B	0.756
DB00929	B	0.756
DB01408	B	0.754
DB00322	B	0.754
DB00415	B	0.754
DB08847	B	0.754
DB00282	B	0.754
DB00415	B	0.754
DB01602	B	0.754
DB00415	B	0.754
DB01406	B	0.754
DB06268	B	0.754
DB00765	B	0.754
DB00204	B	0.754
DB01056	B	0.754
DB01060	B	0.754
DB00585	B	0.754
DB08897	B	0.752
DB00768	B	0.752
DB08824	B	0.752
DB00430	B	0.752
DB00833	B	0.752
DB00567	B	0.752
DB00905	B	0.75
DB00629	B	0.75
DB00485	B	0.75
DB06243	B	0.75
DB08933	B	0.75
DB06718	B	0.75
